# Supplementary material
Source: PubMed Central journal article supplement (PMC2920359)
Supplement: NIHMS210721-supplement-Suppl_.pdf [file NIHMS210721-supplement-Suppl_.pdf]

### Figure Legends:

Figure S1a. Weight change from baseline over the course of the 16-week trial for patients completing the trial. Mean values for carriers of the *DRD2* -141C deletion allele are depicted in red; non-carriers are depicted in blue. Values are corrected for medication assignment (OLZ/RIS) and race (Caucasian/non-Caucasian). Univariate factorial ANOVA reveals a significant main effect of genotype ( $F_{1,25}=5.5$ ,  $p=.031$ ).

Figure S1b. BMI change from baseline over the course of the 16-week trial for patients completing the trial. Mean values for carriers of the *DRD2* -141C deletion allele are depicted in red; non-carriers are depicted in blue. Values are corrected for medication assignment (OLZ/RIS) and race (Caucasian/non-Caucasian). Univariate factorial ANOVA reveals a trend for main effect of genotype ( $F_{1,25}=4.0$ ,  $p=.06$ ).

Figure S1c. Weight change from baseline over the course of the 16-week trial for patients completing the trial. Mean values for homozygotes of the *DRD2* -141C deletion allele are depicted in red; heterozygotes are in purple; non-carriers are depicted in blue. Values are corrected for medication assignment (OLZ/RIS) and race (Caucasian/non-Caucasian). Univariate factorial ANOVA reveals a trend for main effect of genotype ( $F_{2,25}=3.1$ ,  $p=.073$ ).

Figure S1d. BMI change from baseline over the course of the 16-week trial for patients completing the trial. Mean values for homozygotes of the *DRD2* -141C deletion allele are depicted in red; heterozygotes are in purple; non-carriers are depicted in blue. Values are corrected for medication assignment (OLZ/RIS) and race (Caucasian/non-Caucasian). Univariate factorial ANOVA reveals a nonsignificant main effect of genotype ( $F_{2,25}=2.3$ ,  $p=.132$ ).

Figure S2a. Weight change from baseline over the course of the first six weeks of the trial. Mean values for carriers of the *DRD2* -141C deletion allele are depicted in red; non-carriers are depicted in blue. Values are corrected for medication assignment (OLZ/RIS) and race (Caucasian/non-Caucasian). Univariate factorial ANOVA reveals a significant main effect of genotype ( $F_{1,33}=5.1$ ,  $p=.032$ ).

Figure S2b. BMI change from baseline over the course of the first six weeks of the trial. Mean values for carriers of the *DRD2* -141C deletion allele are depicted in red; non-carriers are depicted in blue. Values are corrected for medication assignment (OLZ/RIS) and race (Caucasian/non-Caucasian). Univariate factorial ANOVA reveals a significant main effect of genotype ( $F_{1,33}=4.8$ ,  $p=.038$ ).

Figure S2c. Weight change from baseline over the course of the first six weeks of the trial. Mean values for homozygotes of the *DRD2* -141C deletion allele are depicted in red; heterozygotes are in purple; non-carriers are depicted in blue. Values are corrected for medication assignment (OLZ/RIS) and race (Caucasian/non-Caucasian). Univariate factorial ANOVA reveals a trend for main effect of genotype ( $F_{2,33}=2.9$ ,  $p=.073$ ).

Figure S2d. BMI change from baseline over the course of the the first six weeks of the trial. Mean values for homozygotes of the *DRD2* -141C deletion allele are depicted in red; heterozygotes are in purple; non-carriers are depicted in blue. Values are corrected for medication assignment (OLZ/RIS) and race (Caucasian/non-Caucasian). Univariate factorial ANOVA reveals a trend for main effect of genotype ( $F_{2,33}=2.7$ ,  $p=.086$ ).

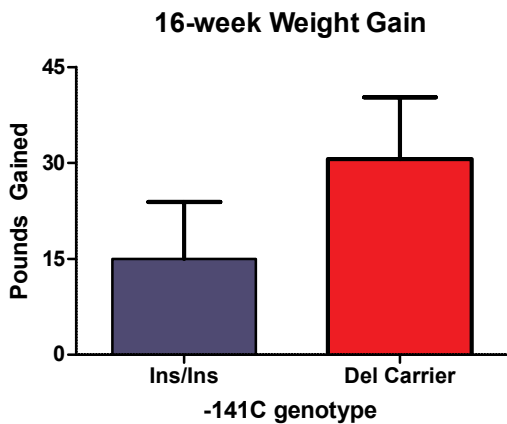

Figure S1a

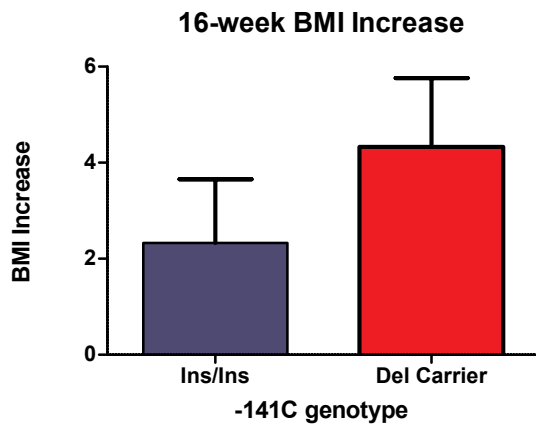

Figure S1b

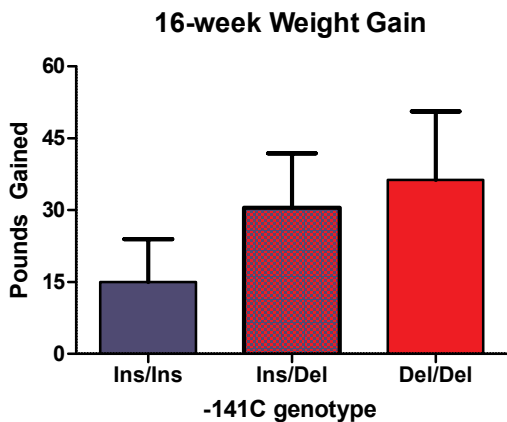

Figure S1c

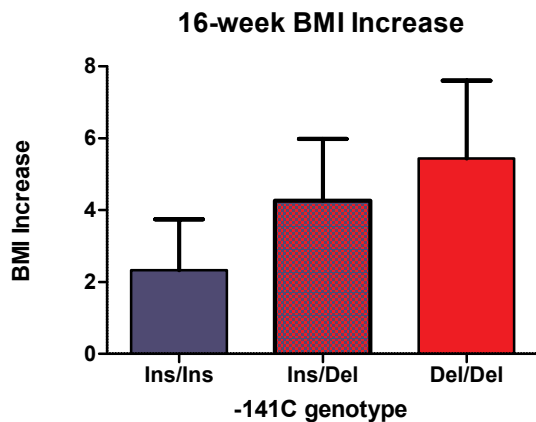

Figure S1d

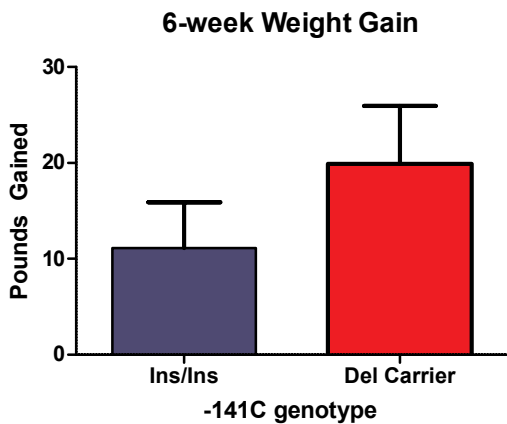

Figure S2a

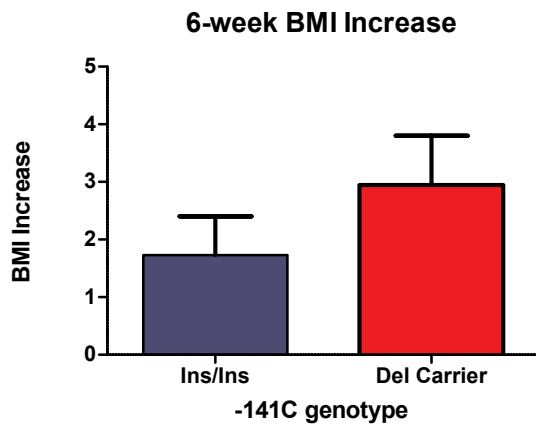

Figure S2b

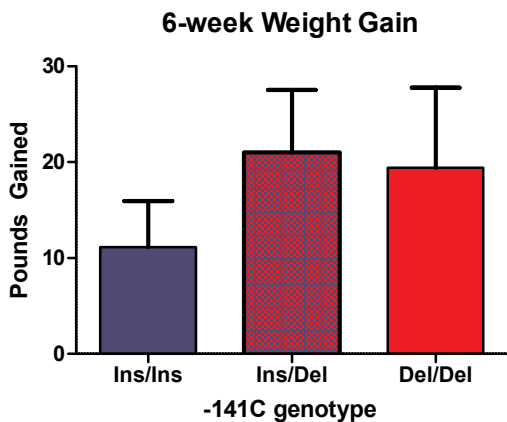

Figure S2c

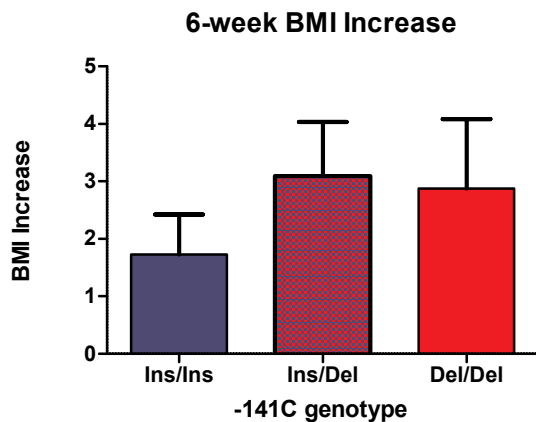

Figure S2d
